# Supplementary material
Source: PubMed Central journal article supplement (PMC4681664)
Supplement: NIHMS731313-supplement-3.pdf [file NIHMS731313-supplement-3.pdf]

# Supplementary Figure-3

|               |                                                                                      |      |
|---------------|--------------------------------------------------------------------------------------|------|
| mPac1-Null: 1 | atggccagaaccctgcagctctccctgactgctctcctcctgctgcctatggctattgctatgcactctgactgcatcttc    |      |
| mPac1-Hop1:   | atggccagaaccctgcagctctccctgactgctctcctcctgctgcctatggctattgctatgcactctgactgcatcttc    | 81   |
| mPac1-Hop2:   | atggccagaaccctgcagctctccctgactgctctcctcctgctgcctatggctattgctatgcactctgactgcatcttc    |      |
| mPac1-Null:   | aagaaggagcaagccatgtgcttggagaggatccagagggccaacgacctgatgggcctaaatgagtcttccccaggttgc    |      |
| mPac1-Hop1:   | aagaaggagcaagccatgtgcttggagaggatccagagggccaacgacctgatgggcctaaatgagtcttccccaggttgc    | 162  |
| mPac1-Hop2:   | aagaaggagcaagccatgtgcttggagaggatccagagggccaacgacctgatgggcctaaatgagtcttccccaggttgc    |      |
| mPac1-Null:   | cctggcatgtgggacaatatcacatggttgaagcctgctcaaataggtgagatggtccttgtgagctgcctgaggtcttc     |      |
| mPac1-Hop1:   | cctggcatgtgggacaatatcacatggttgaagcctgctcaaataggtgagatggtccttgtgagctgcctgaggtcttc     | 243  |
| mPac1-Hop2:   | cctggcatgtgggacaatatcacatggttgaagcctgctcaaataggtgagatggtccttgtgagctgcctgaggtcttc     |      |
| mPac1-Null:   | cggatcttcaaccggaccaagtctggatgacagaaacctataggggattctggcttggctgatagtaattccttggagatc    |      |
| mPac1-Hop1:   | cggatcttcaaccggaccaagtctggatgacagaaacctataggggattctggcttggctgatagtaattccttggagatc    | 324  |
| mPac1-Hop2:   | cggatcttcaaccggaccaagtctggatgacagaaacctataggggattctggcttggctgatagtaattccttggagatc    |      |
| mPac1-Null:   | acagacatggggctgctggccggaactgactgaggatggctggcggagccctccccattacttcgatgcttgtggg         |      |
| mPac1-Hop1:   | acagacatggggctgctggccggaactgactgaggatggctggcggagccctccccattacttcgatgcttgtggg         | 405  |
| mPac1-Hop2:   | acagacatggggctgctggccggaactgactgaggatggctggcggagccctccccattacttcgatgcttgtggg         |      |
| mPac1-Null:   | tttgatgactatgagcccgagtctggggatcaggattattactacctgtcggggaagccctctacacagtcggctacagc     |      |
| mPac1-Hop1:   | tttgatgactatgagcccgagtctggggatcaggattattactacctgtcggggaagccctctacacagtcggctacagc     | 486  |
| mPac1-Hop2:   | tttgatgactatgagcccgagtctggggatcaggattattactacctgtcggggaagccctctacacagtcggctacagc     |      |
|               | AA residue 138 Asp / Gly                                                             | TM-1 |
| mPac1-Null:   | acctcccctgctcaccctcaccactgccatggcctccttgtgcccgttccggaagctgactgtaccctgtaacttcacccac   |      |
| mPac1-Hop1:   | acctcccctgctcaccctcaccactgccatggcctccttgtgcccgttccggaagctgactgtaccctgtaacttcacccac   | 567  |
| mPac1-Hop2:   | acctcccctgctcaccctcaccactgccatggcctccttgtgcccgttccggaagctgactgtaccctgtaacttcacccac   |      |
|               | TM-1                                                                                 | TM-2 |
| mPac1-Null:   | atgaacctgtttgtatccttcacatgctgagagctatctctgtcttcatcaaaagactggatcttgtatgccgagcaggacagc |      |
| mPac1-Hop1:   | atgaacctgtttgtatccttcacatgctgagagctatctctgtcttcatcaaaagactggatcttgtatgccgagcaggacagc | 648  |
| mPac1-Hop2:   | atgaacctgtttgtatccttcacatgctgagagctatctctgtcttcatcaaaagactggatcttgtatgccgagcaggacagc |      |
|               | TM-2                                                                                 |      |
| mPac1-Null:   | agtcattgcttctgcttccaccgtggaatgcaagctgtcattggtttcttccactactgctgggtgccaactacttctgg     |      |
| mPac1-Hop1:   | agtcattgcttctgcttccaccgtggaatgcaagctgtcattggtttcttccactactgctgggtgccaactacttctgg     | 729  |
| mPac1-Hop2:   | agtcattgcttctgcttccaccgtggaatgcaagctgtcattggtttcttccactactgctgggtgccaactacttctgg     |      |
|               | AA residue 227 Lys / Arg                                                             | TM-3 |
| mPac1-Null:   | ctggttcattgaaggcctatacctctttacactgctgggagacccctctccctgagaggagatatttctactggatacc      |      |
| mPac1-Hop1:   | ctggttcattgaaggcctatacctctttacactgctgggagacccctctccctgagaggagatatttctactggatacc      | 810  |
| mPac1-Hop2:   | ctggttcattgaaggcctatacctctttacactgctgggagacccctctccctgagaggagatatttctactggatacc      |      |
|               | TM-3                                                                                 |      |
| mPac1-Null:   | atcattggctgggggacacctaactgctgtgtgtaactgtgtgggctgtgctgaggctctactttgatgatgaggatgctgg   |      |
| mPac1-Hop1:   | atcattggctgggggacacctaactgctgtgtgtaactgtgtgggctgtgctgaggctctactttgatgatgaggatgctgg   | 891  |
| mPac1-Hop2:   | atcattggctgggggacacctaactgctgtgtgtaactgtgtgggctgtgctgaggctctactttgatgatgaggatgctgg   |      |
|               | TM-4                                                                                 |      |
| mPac1-Null:   | gatatgaatgacagcacagctctgtggtgggtgatcaaaagccctgtagttggctctataatgggtaactttgtgcttttc    |      |
| mPac1-Hop1:   | gatatgaatgacagcacagctctgtggtgggtgatcaaaagccctgtagttggctctataatgggtaactttgtgcttttc    | 972  |
| mPac1-Hop2:   | gatatgaatgacagcacagctctgtggtgggtgatcaaaagccctgtagttggctctataatgggtaactttgtgcttttc    |      |
|               | TM-5                                                                                 |      |
| mPac1-Null:   | atcggcatcatcatcatccttgtgcagaagctgcagctcccagacatgggaggcaatgagtcgagcatctac-----        | 1047 |
| mPac1-Hop1:   | atcggcatcatcatcatccttgtgcagaagctgcagctcccagacatgggaggcaatgagtcgagcatctacttcagctgc    | 1053 |
| mPac1-Hop2:   | atcggcatcatcatcatccttgtgcagaagctgcagctcccagacatgggaggcaatgagtcgagcatctacttc---tgc    | 1050 |
|               | TM-5                                                                                 |      |
| mPac1-Null:   | -----ttacgg                                                                          | 1050 |
| mPac1-Hop1:   | gtgcagaaatgctactgcaagccacagcgggctcagcagcactcttgcagatgtcagaactatccaccattactctacgg     | 1134 |
| mPac1-Hop2:   | gtgcagaaatgctactgcaagccacagcgggctcagcagcactcttgcagatgtcagaactatccaccattactctacgg     | 1131 |
| mPac1-Null:   | ctggcccgtcccaccctgctgctcatcccactctttggaatccactacacagatatttgccttctctccagagaacgtcagc   | 1131 |
| mPac1-Hop1:   | ctggcccgtcccaccctgctgctcatcccactctttggaatccactacacagatatttgccttctctccagagaacgtcagc   | 1215 |
| mPac1-Hop2:   | ctggcccgtcccaccctgctgctcatcccactctttggaatccactacacagatatttgccttctctccagagaacgtcagc   | 1212 |
|               | TM-6                                                                                 |      |
| mPac1-Null:   | aagagggaaagacttgtgtttgagcttgggctgggctccttccagggcttgggtggctgtactctactgcttccctgaat     | 1212 |
| mPac1-Hop1:   | aagagggaaagacttgtgtttgagcttgggctgggctccttccagggcttgggtggctgtactctactgcttccctgaat     | 1296 |
| mPac1-Hop2:   | aagagggaaagacttgtgtttgagcttgggctgggctccttccagggcttgggtggctgtactctactgcttccctgaat     | 1293 |
|               | TM-7                                                                                 |      |
| mPac1-Null:   | ggggaggtacaggcagagattaagaggaaatggaggagctggaaggtgaaccggttacttcaactatggacttcaagcaccgg  | 1293 |
| mPac1-Hop1:   | ggggaggtacaggcagagattaagaggaaatggaggagctggaaggtgaaccggttacttcaactatggacttcaagcaccgg  | 1377 |
| mPac1-Hop2:   | ggggaggtacaggcagagattaagaggaaatggaggagctggaaggtgaaccggttacttcaactatggacttcaagcaccgg  | 1374 |
| mPac1-Null:   | catccatccctggccagcagtgagtgaaacggggcaccacagctgtccatcctgagcaagagcagctcccagctccgcatg    | 1374 |
| mPac1-Hop1:   | catccatccctggccagcagtgagtgaaacggggcaccacagctgtccatcctgagcaagagcagctcccagctccgcatg    | 1458 |
| mPac1-Hop2:   | catccatccctggccagcagtgagtgaaacggggcaccacagctgtccatcctgagcaagagcagctcccagctccgcatg    | 1455 |
| mPac1-Null:   | tccagcctcccggccgacaacttggccacctag                                                    | 1407 |
| mPac1-Hop1:   | tccagcctcccggccgacaacttggccacctag                                                    | 1491 |
| mPac1-Hop2:   | tccagcctcccggccgacaacttggccacctag                                                    | 1488 |
