# Supplementary material
Source: PubMed Central journal article supplement (PMC4681664)

# Supplementary Figure-1

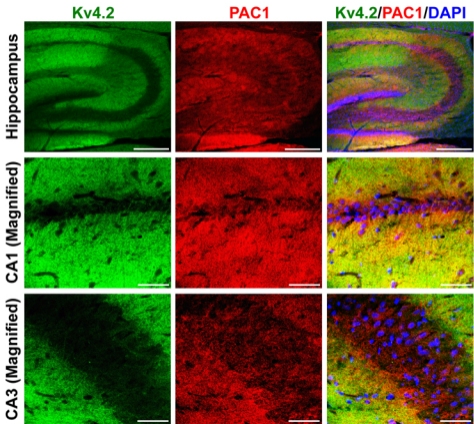

Supplement: NIHMS731313-supplement-1.pdf [file NIHMS731313-supplement-1.pdf]

# Supplementary Figure-2

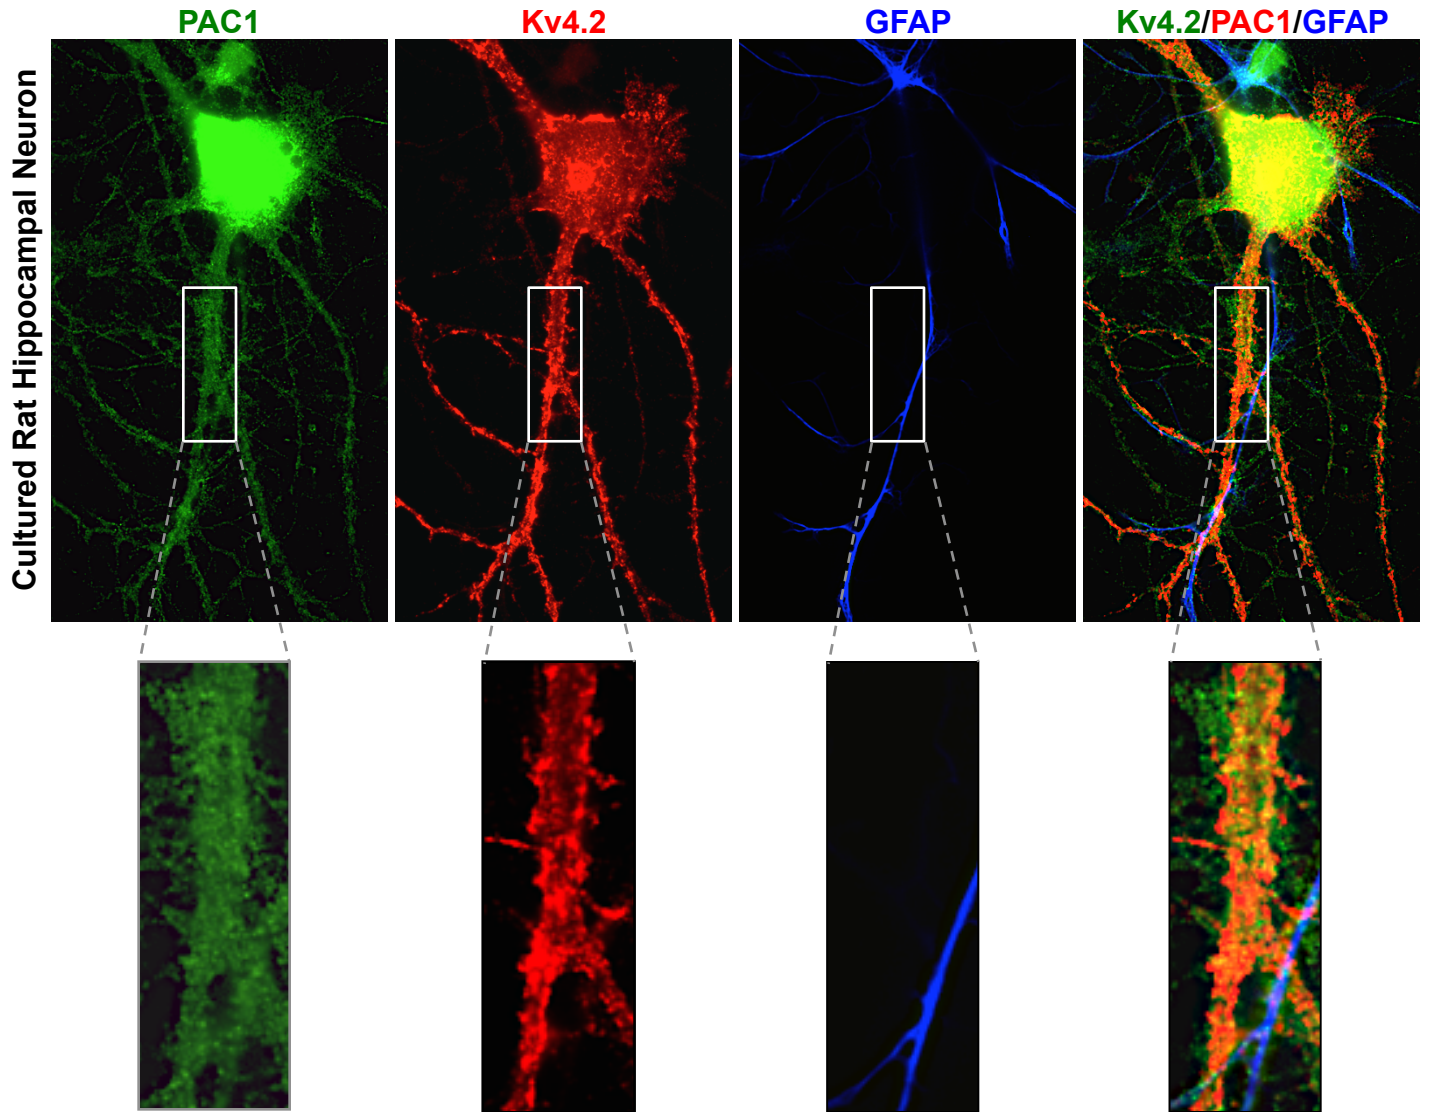

Supplement: NIHMS731313-supplement-2.pdf [file NIHMS731313-supplement-2.pdf]
